# Supplementary material for: Metastasis of breast cancer to bones alters the tumor immune microenvironment
Source: Springer Nature journal article supplement (doi:10.1186/s40001-023-01083-w), 2023-03-13
Supplement: MOESM4 [file 24618154]

Luminal

Her2 positive

Triple Negative

CD4

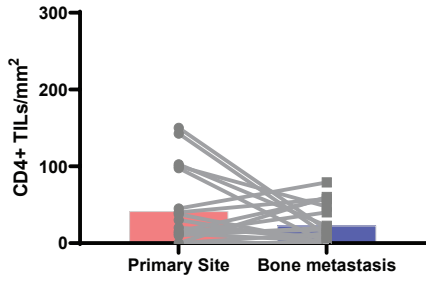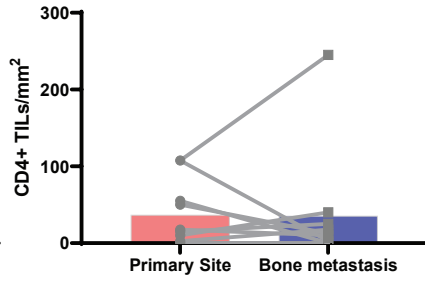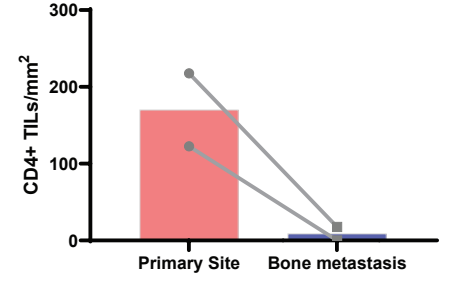

CD8

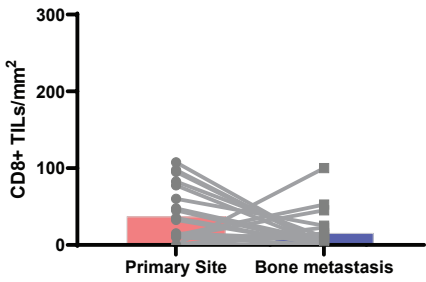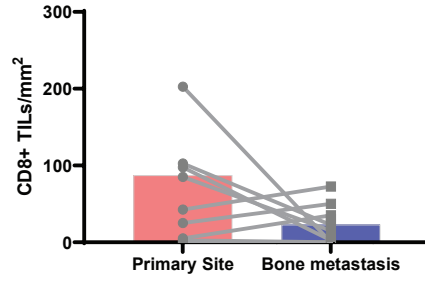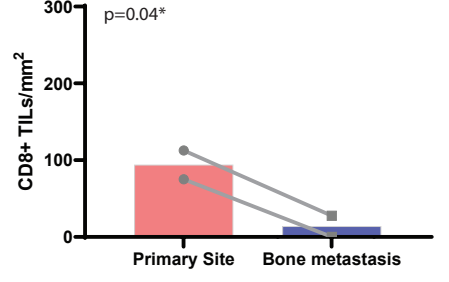

CD68

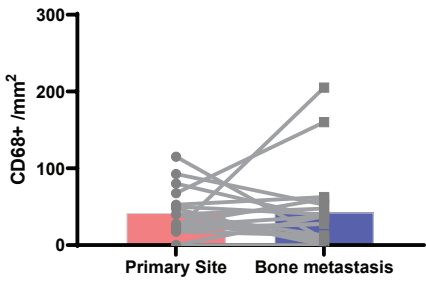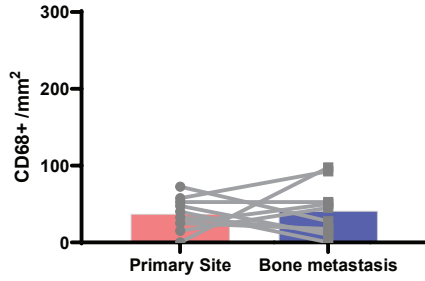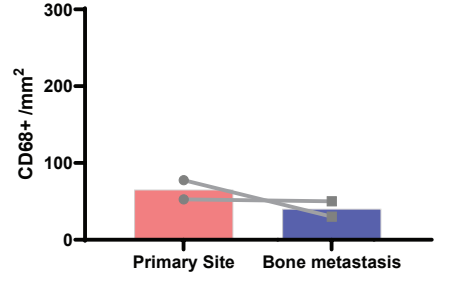

HLA-DR

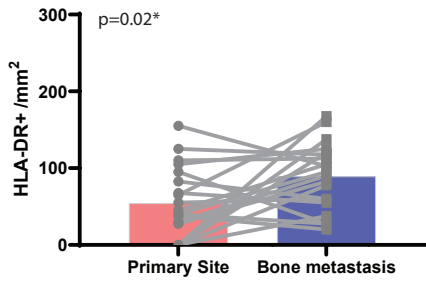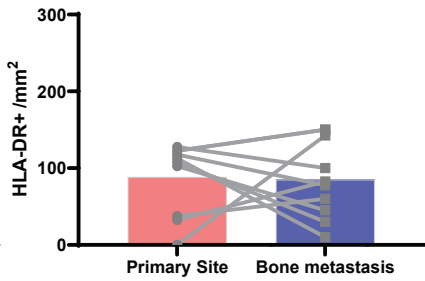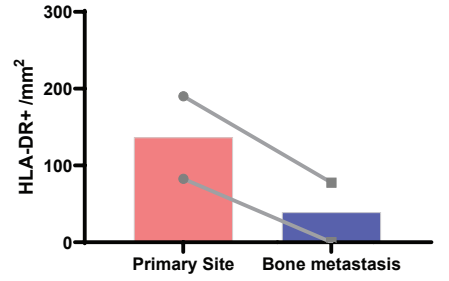

PD-1

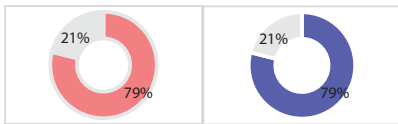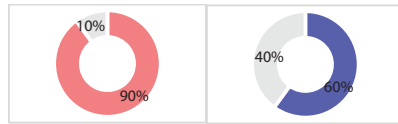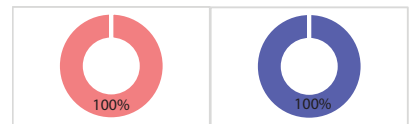

PD-L1

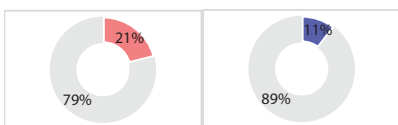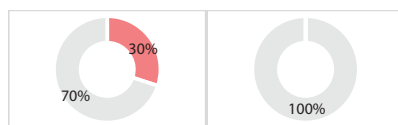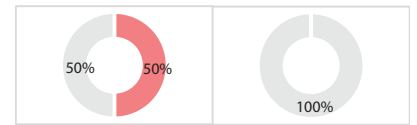

■ Primary site(Positive)  
■ Bone metastasis(Positive)  
■ Negative
